# Supplementary material for: Ultrasound-guided Hydrorelease/Hydrodissection Reduces Gliding Resistance in a Rat Sciatic Nerve Adhesion Model : a preclinical experimental study
Source: Research Square preprint supplement (doi:10.21203/rs.3.rs-8624003/v1), 2026-01-20
Supplement: Supplementary file 1 [file 0572aa9f5c47cb4681e6df22.xlsx]

## Sheet: TS_Timecourse_raw
Record_ID	Outcome	Unit	Group	Timepoint_weeks	Intervention	Value
TS_TC_Control_01	Tensile_strength	N	Control	0		0.59
TS_TC_Control_02	Tensile_strength	N	Control	0		1.29
TS_TC_Control_03	Tensile_strength	N	Control	0		0.46
TS_TC_Control_04	Tensile_strength	N	Control	0		1.12
TS_TC_Control_05	Tensile_strength	N	Control	0		0.95
TS_TC_Control_06	Tensile_strength	N	Control	0		0.93
TS_TC_Control_07	Tensile_strength	N	Control	0		1
TS_TC_1W_01	Tensile_strength	N	1W	1		0.83
TS_TC_1W_02	Tensile_strength	N	1W	1		2.8
TS_TC_1W_03	Tensile_strength	N	1W	1		1.27
TS_TC_1W_04	Tensile_strength	N	1W	1		0.88
TS_TC_1W_05	Tensile_strength	N	1W	1		0.76
TS_TC_1W_06	Tensile_strength	N	1W	1		0.53
TS_TC_1W_07	Tensile_strength	N	1W	1		0.78
TS_TC_3W_01	Tensile_strength	N	3W	3		1.61
TS_TC_3W_02	Tensile_strength	N	3W	3		1.5
TS_TC_3W_03	Tensile_strength	N	3W	3		1.52
TS_TC_3W_04	Tensile_strength	N	3W	3		2.55
TS_TC_3W_05	Tensile_strength	N	3W	3		1.9
TS_TC_3W_06	Tensile_strength	N	3W	3		1.73
TS_TC_3W_07	Tensile_strength	N	3W	3		1.24
TS_TC_6W_01	Tensile_strength	N	6W	6		3.03
TS_TC_6W_02	Tensile_strength	N	6W	6		2.81
TS_TC_6W_03	Tensile_strength	N	6W	6		3.42
TS_TC_6W_04	Tensile_strength	N	6W	6		3.63
TS_TC_6W_05	Tensile_strength	N	6W	6		3.5
TS_TC_6W_06	Tensile_strength	N	6W	6		3.07
TS_TC_6W_07	Tensile_strength	N	6W	6		2.22

## Sheet: TS_Comparison_long
Record_ID	Outcome	Unit	Group	Timepoint_weeks	Intervention	Value
TS_COMP_01_CTRL	Tensile_strength	N	Control	0		0.59
TS_COMP_01_ADH	Tensile_strength	N	Adhesion_6W	6		3.03
TS_COMP_01_HRHD	Tensile_strength	N	Adhesion_6W_plus_HRHD	6	Ultrasound-guided HR/HD (2 mL saline)	2.02
TS_COMP_02_CTRL	Tensile_strength	N	Control	0		1.29
TS_COMP_02_ADH	Tensile_strength	N	Adhesion_6W	6		2.81
TS_COMP_02_HRHD	Tensile_strength	N	Adhesion_6W_plus_HRHD	6	Ultrasound-guided HR/HD (2 mL saline)	1.9
TS_COMP_03_CTRL	Tensile_strength	N	Control	0		0.46
TS_COMP_03_ADH	Tensile_strength	N	Adhesion_6W	6		3.42
TS_COMP_03_HRHD	Tensile_strength	N	Adhesion_6W_plus_HRHD	6	Ultrasound-guided HR/HD (2 mL saline)	1.19
TS_COMP_04_CTRL	Tensile_strength	N	Control	0		1.12
TS_COMP_04_ADH	Tensile_strength	N	Adhesion_6W	6		3.63
TS_COMP_04_HRHD	Tensile_strength	N	Adhesion_6W_plus_HRHD	6	Ultrasound-guided HR/HD (2 mL saline)	2.3
TS_COMP_05_CTRL	Tensile_strength	N	Control	0		0.95
TS_COMP_05_ADH	Tensile_strength	N	Adhesion_6W	6		3.5
TS_COMP_05_HRHD	Tensile_strength	N	Adhesion_6W_plus_HRHD	6	Ultrasound-guided HR/HD (2 mL saline)	2.24
TS_COMP_06_CTRL	Tensile_strength	N	Control	0		0.93
TS_COMP_06_ADH	Tensile_strength	N	Adhesion_6W	6		3.07
TS_COMP_06_HRHD	Tensile_strength	N	Adhesion_6W_plus_HRHD	6	Ultrasound-guided HR/HD (2 mL saline)	2.47
TS_COMP_07_CTRL	Tensile_strength	N	Control	0		1
TS_COMP_07_ADH	Tensile_strength	N	Adhesion_6W	6		2.22
TS_COMP_07_HRHD	Tensile_strength	N	Adhesion_6W_plus_HRHD	6	Ultrasound-guided HR/HD (2 mL saline)	2.25

## Sheet: NCS_Distal_CMAP
Record_ID	Right_distal_CMAP_mV	Left_distal_CMAP_mV	Intervention	Timepoint_weeks	Outcome	Unit
NCS_01	2.655	2.329		6	Distal_CMAP	mV
NCS_02	4.115	3.579		6	Distal_CMAP	mV
NCS_03	3.201	3.709		6	Distal_CMAP	mV
NCS_04	5.199	6.739		6	Distal_CMAP	mV
NCS_05	1.342	4.644		6	Distal_CMAP	mV
NCS_06	7.761	2.946		6	Distal_CMAP	mV
NCS_07	2.443	8.992		6	Distal_CMAP	mV
NCS_08	2.923	3.047		6	Distal_CMAP	mV

## Sheet: README
Notes
TensileStrength_Comparison_raw_long is provided in long format to avoid implying paired/matched observations.
Comparisons between Adhesion_6W (Experiment 1) and Adhesion_6W_plus_HRHD (Experiment 2) are unpaired; different animals were used in each group.
Record_IDs are assigned for traceability because the source appendix did not include explicit animal identifiers.
