# Supplementary material for: Ultrasound-guided Hydrorelease/Hydrodissection Reduces Gliding Resistance in a Rat Sciatic Nerve Adhesion Model : a preclinical experimental study
Source: Research Square preprint supplement (doi:10.21203/rs.3.rs-8624003/v1), 2026-01-20
Supplement: Supplementary file 2 [file 4d24625faa26fdaffa692fd8.xlsx]

## Sheet: Variable_Definitions
Variable	Description	Unit	Where
Record_ID	Unique record identifier created for supplementary files; does not exist in original experiment log.		All sheets
Outcome	Outcome name.		TensileStrength_Timecourse_raw
Group	Study group label as provided in Appendix.xlsx (Control, 1W, 3W, 6W).		TensileStrength_Timecourse_raw
Timepoint_weeks	Time after adhesion model creation (weeks). Control=0.	weeks	TensileStrength_Timecourse_raw
Intervention	Intervention applied before measurement. For timecourse table, none.		TensileStrength_Timecourse_raw
Value	Measured value for the specified outcome.	N	TensileStrength_Timecourse_raw
Right_distal_CMAP_mV	Distal CMAP amplitude measured on right side (adhesion side) as provided in Appendix.xlsx.	mV	NCS_Distal_CMAP_raw
Left_distal_CMAP_mV	Distal CMAP amplitude measured on left side (contralateral/control) as provided in Appendix.xlsx.	mV	NCS_Distal_CMAP_raw
Control_Tensile_strength_N	Tensile strength (N) for Control in the comparison table.	N	TensileStrength_Comparison_raw
Adhesion_Tensile_strength_N	Tensile strength (N) for Adhesion in the comparison table.	N	TensileStrength_Comparison_raw
Adhesion_plus_HRHD_Tensile_strength_N	Tensile strength (N) for Adhesion + Hydrorelease/Hydrodissection in the comparison table.	N	TensileStrength_Comparison_raw
Note	Clarifying notes about extraction and pairing assumptions.		TensileStrength_Comparison_raw

## Sheet: Notes
Analysis_notes_and_variable_definitions
How these files were created:
1) Extracted three raw tables from Appendix.xlsx (Sheet1) and removed the Average/SE rows.
2) Converted the time-course tensile strength table into long format (one value per row).
3) Created new Record_IDs for traceability; these are not original animal IDs.
nan
Important:
- The original Appendix.xlsx does not include explicit animal identifiers; therefore, Record_IDs are assigned by row order.
- In the tensile strength comparison table, pairing between Control/Adhesion/Adhesion+HRHD is assumed by row order.
- Please confirm sample sizes (n) and whether any rows should be excluded to match the manuscript.
Unpaired comparison: the untreated 6-week adhesion group and the adhesion + HR/HD group consisted of different animals (no within-animal matching).
